# Supplementary material for: Preparation of Nanofibrous PVDF Membrane by Solution Blow Spinning for Mechanical Energy Harvesting
Source: MDPI journal article supplement (doi:10.3390/nano9081090), 2019-07-30
Supplement: s1 [file s1]

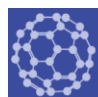

## Article

# Preparation of Nanofibrous PVDF Membrane by Solution Blow Spinning for Mechanical Energy Harvesting

Rui-Qiang Liu <sup>1,†</sup>, Xiao-Xiong Wang <sup>1,†</sup>, Jie Fu <sup>2</sup>, Qian-Qian Zhang <sup>1</sup>, Wei-Zhi Song <sup>1</sup>, Yuan Xu <sup>1</sup>, You-Qiang Chen <sup>1</sup>, Seeram Ramakrishna <sup>1,3</sup> and Yun-Ze Long <sup>1,\*</sup>

<sup>1</sup> Collaborative Innovation Center for Nanomaterials & Devices, College of Physics, Qingdao University, Qingdao 266071, China

<sup>2</sup> State Key Laboratory of Bio-Fibers and Eco-Textiles, Qingdao University, Qingdao 266071, China

<sup>3</sup> Center for Nanofibers & Nanotechnology, Faculty of Engineering, National University of Singapore, Singapore 119077, Singapore

\* Correspondence: Correspondence: [yunze.long@163.com](mailto:yunze.long@163.com) or [yunze.long@qdu.edu.cn](mailto:yunze.long@qdu.edu.cn); Tel.: +86-139-5329-0681; Fax: +86-532-8595-5977

† These authors contributed equally to this work.

Received: 9 June 2019; Accepted: 24 July 2019; Published: date

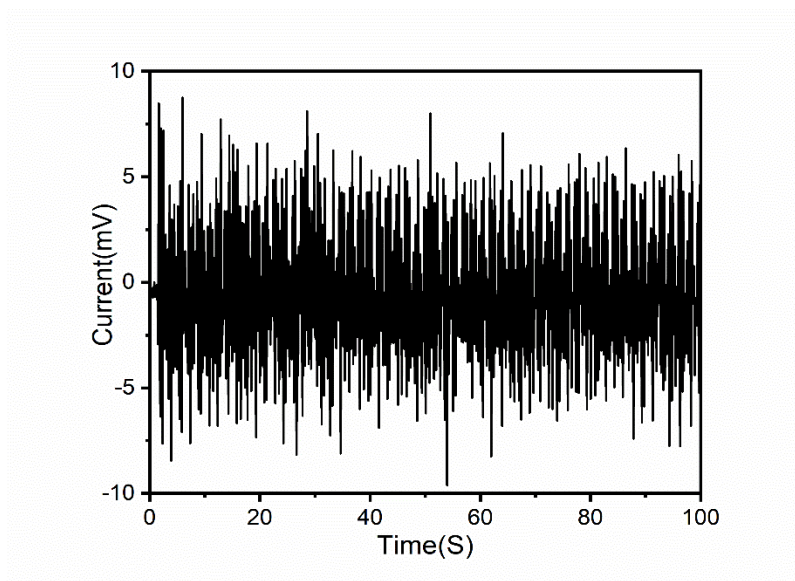

**Figure S1.** 0.8Hz frequency change voltage output (Rigol DM 3058).

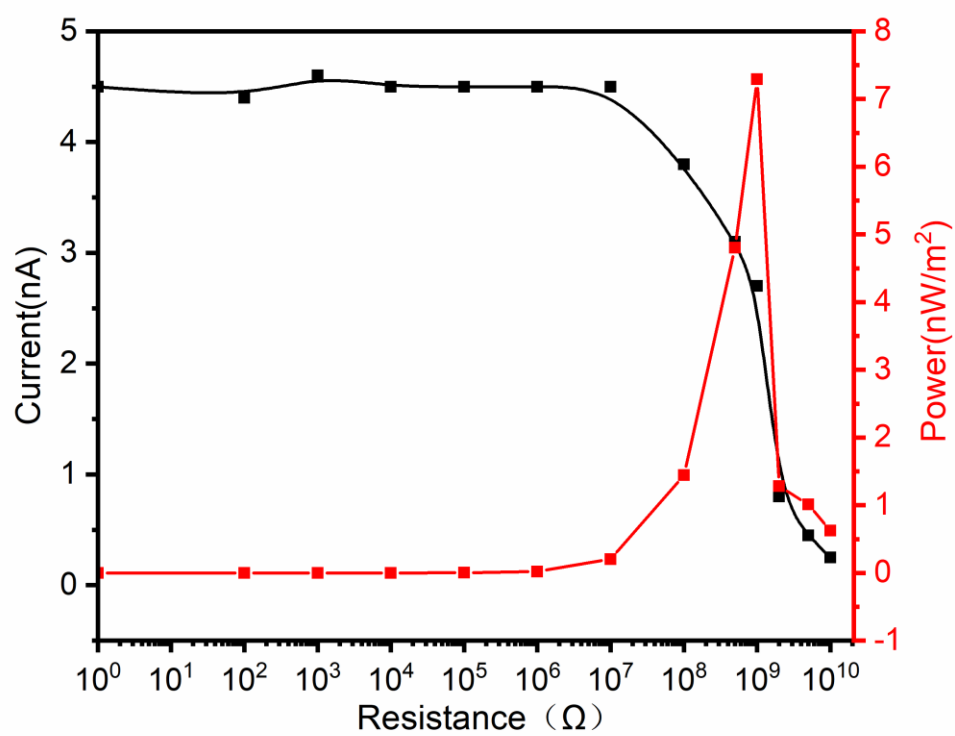

**Figure S2.** Output current and output power of NG with various external load resistances.

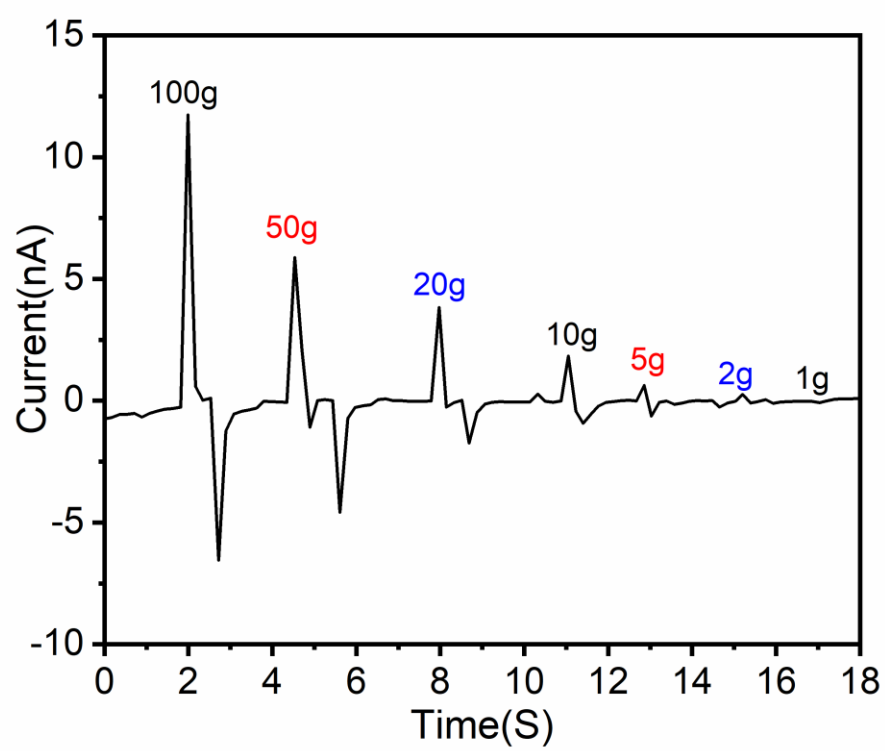

**Figure S3.** NG's sensing size for different weights.
